# Supplementary material
Source: PubMed Central journal article supplement (PMC7803912)
Supplement: jim-2020-001555supp001.pdf [file jim-2020-001555supp001.pdf]

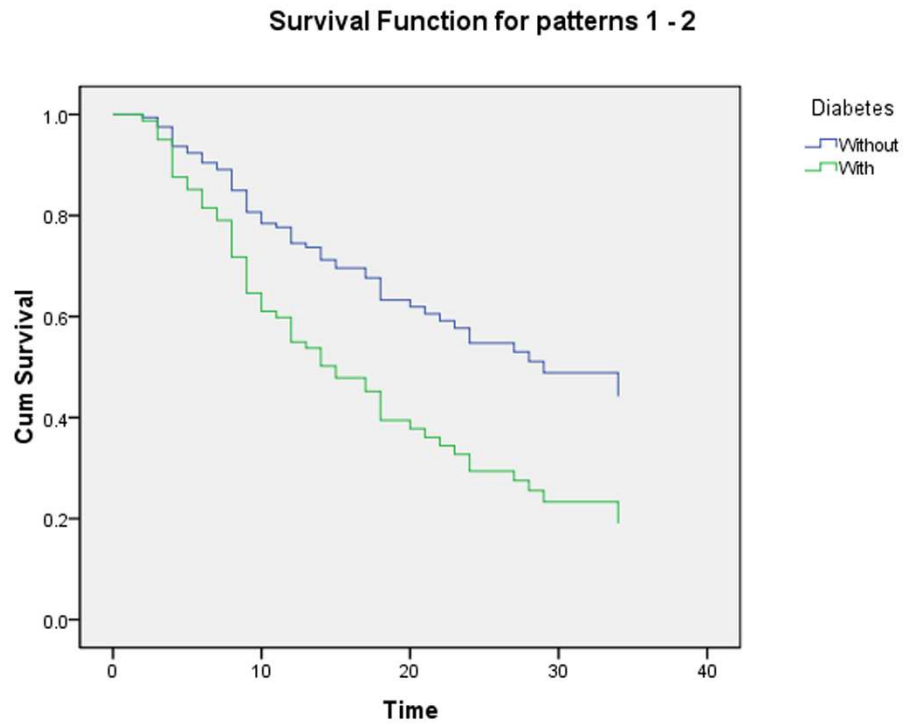

Figure S1 Survival curve of critical COVID-19 patients with diabetes

Table S1 Association between sex, gender, comorbidities and death in patients with critical COVID-19 analyzed by using multivariate logistic regression model

**Omnibus Tests of Model Coefficients**

|        |       | Chi-square | df | Sig. |
|--------|-------|------------|----|------|
| Step 1 | Step  | 20.916     | 8  | .007 |
|        | Block | 20.916     | 8  | .007 |
|        | Model | 20.916     | 8  | .007 |

**Variables in the Equation**

|                         | B      | S.E.  | Wald   | df | Sig. | Exp(B) | 95.0% C.I. for EXP(B) |        |
|-------------------------|--------|-------|--------|----|------|--------|-----------------------|--------|
|                         |        |       |        |    |      |        | Lower                 | Upper  |
| Step 1 <sup>a</sup> Sex | 1.480  | .429  | 11.919 | 1  | .001 | 4.395  | 1.896                 | 10.185 |
| Age                     | .024   | .016  | 2.285  | 1  | .131 | 1.025  | .993                  | 1.058  |
| COPD                    | -.236  | 1.006 | .055   | 1  | .814 | .789   | .110                  | 5.671  |
| Hypertension            | -.224  | .422  | .282   | 1  | .596 | .799   | .349                  | 1.828  |
| CHD                     | -.250  | .632  | .156   | 1  | .693 | .779   | .226                  | 2.688  |
| Arrhythmia              | -.002  | .977  | .000   | 1  | .998 | .998   | .147                  | 6.768  |
| Diabetes                | 1.265  | .566  | 4.986  | 1  | .026 | 3.542  | 1.167                 | 10.750 |
| CRF                     | .546   | 1.278 | .182   | 1  | .670 | 1.726  | .141                  | 21.136 |
| Constant                | -2.735 | 1.142 | 5.738  | 1  | .017 | .065   |                       |        |

## Variables in the Equation

|                         | B     | S.E.  | Wald   | df | Sig. | Exp(B) | 95.0% C.I. for EXP(B) |        |
|-------------------------|-------|-------|--------|----|------|--------|-----------------------|--------|
|                         |       |       |        |    |      |        | Lower                 | Upper  |
| Step 1 <sup>a</sup> Sex | 1.480 | .429  | 11.919 | 1  | .001 | 4.395  | 1.896                 | 10.185 |
| Age                     | .024  | .016  | 2.285  | 1  | .131 | 1.025  | .993                  | 1.058  |
| COPD                    | -.236 | 1.006 | .055   | 1  | .814 | .789   | .110                  | 5.671  |
| Hypertension            | -.224 | .422  | .282   | 1  | .596 | .799   | .349                  | 1.828  |
| CHD                     | -.250 | .632  | .156   | 1  | .693 | .779   | .226                  | 2.688  |
| Arrhythmia              | -.002 | .977  | .000   | 1  | .998 | .998   | .147                  | 6.768  |
| Diabetes                | 1.265 | .566  | 4.986  | 1  | .026 | 3.542  | 1.167                 | 10.750 |
| CRF                     | .546  | 1.278 | .182   | 1  | .670 | 1.726  | .141                  | 21.136 |

a. Variable(s) entered on step 1: Sex, Age, COPD, Hypertension, CHD, Arrhythmia, Diabetes, CRF.

Table S2 Association between sex, gender, comorbidities and death in patients with critical COVID-19 analyzed by using Cox proportional hazards regression model

Omnibus Tests of Model Coefficients<sup>h,i</sup>

| Step           | -2 Log Likelihood | Overall (score) |    |      | Change From Previous Step |    |      | Change From Previous Block |    |      |
|----------------|-------------------|-----------------|----|------|---------------------------|----|------|----------------------------|----|------|
|                |                   | Chi-square      | df | Sig. | Chi-square                | df | Sig. | Chi-square                 | df | Sig. |
| 1 <sup>a</sup> | 490.686           | 22.849          | 8  | .004 | 22.152                    | 8  | .005 | 22.152                     | 8  | .005 |

|                |         |        |   |      |       |   |      |        |   |      |
|----------------|---------|--------|---|------|-------|---|------|--------|---|------|
| 2 <sup>b</sup> | 490.687 | 22.842 | 7 | .002 | .000  | 1 | .986 | 22.151 | 7 | .002 |
| 3 <sup>c</sup> | 490.711 | 22.719 | 6 | .001 | .024  | 1 | .876 | 22.127 | 6 | .001 |
| 4 <sup>d</sup> | 490.741 | 22.706 | 5 | .000 | .029  | 1 | .864 | 22.097 | 5 | .001 |
| 5 <sup>e</sup> | 490.796 | 22.450 | 4 | .000 | .056  | 1 | .814 | 22.042 | 4 | .000 |
| 6 <sup>f</sup> | 490.942 | 22.375 | 3 | .000 | .145  | 1 | .703 | 21.896 | 3 | .000 |
| 7 <sup>g</sup> | 493.516 | 19.531 | 2 | .000 | 2.575 | 1 | .109 | 19.321 | 2 | .000 |

a. Variable(s) Entered at Step Number 1: Sex Age COPD Hypertension CHD Arrhythmia Diabetes CRF

b. Variable Removed at Step Number 2: COPD

c. Variable Removed at Step Number 3: Arrhythmia

d. Variable Removed at Step Number 4: CHD

e. Variable Removed at Step Number 5: CRF

f. Variable Removed at Step Number 6: Hypertension

g. Variable Removed at Step Number 7: Age

h. Beginning Block Number 0, initial Log Likelihood function: -2 Log likelihood: 512.838

i. Beginning Block Number 1. Method = Backward Stepwise (Likelihood Ratio)

#### Variables in the Equation

|        |     | B     | SE   | Wald   | df | Sig. | Exp(B) | 95.0% CI for Exp(B) |       |
|--------|-----|-------|------|--------|----|------|--------|---------------------|-------|
|        |     |       |      |        |    |      |        | Lower               | Upper |
| Step 1 | Sex | 1.088 | .319 | 11.662 | 1  | .001 | 2.969  | 1.590               | 5.544 |
|        | Age | .017  | .011 | 2.716  | 1  | .099 | 1.018  | .997                | 1.039 |

|        |              |       |      |        |   |      |       |       |       |
|--------|--------------|-------|------|--------|---|------|-------|-------|-------|
|        | COPD         | .012  | .662 | .000   | 1 | .986 | 1.012 | .276  | 3.705 |
|        | Hypertension | -.109 | .287 | .145   | 1 | .703 | .896  | .511  | 1.573 |
|        | CHD          | .076  | .437 | .030   | 1 | .862 | 1.079 | .458  | 2.543 |
|        | Arrhythmia   | -.102 | .677 | .023   | 1 | .880 | .903  | .240  | 3.402 |
|        | Diabetes     | .664  | .306 | 4.713  | 1 | .030 | 1.943 | 1.067 | 3.539 |
|        | CRF          | .188  | .752 | .062   | 1 | .803 | 1.206 | .277  | 5.264 |
| Step 2 | Sex          | 1.089 | .314 | 12.013 | 1 | .001 | 2.972 | 1.605 | 5.501 |
|        | Age          | .017  | .011 | 2.721  | 1 | .099 | 1.018 | .997  | 1.039 |
|        | Hypertension | -.110 | .284 | .151   | 1 | .698 | .896  | .514  | 1.562 |
|        | CHD          | .075  | .436 | .030   | 1 | .863 | 1.078 | .459  | 2.533 |
|        | Arrhythmia   | -.098 | .633 | .024   | 1 | .877 | .907  | .262  | 3.137 |
|        | Diabetes     | .664  | .306 | 4.726  | 1 | .030 | 1.943 | 1.068 | 3.538 |
|        | CRF          | .186  | .748 | .062   | 1 | .803 | 1.205 | .278  | 5.223 |
| Step 3 | Sex          | 1.096 | .311 | 12.438 | 1 | .000 | 2.993 | 1.627 | 5.504 |
|        | Age          | .017  | .010 | 2.741  | 1 | .098 | 1.017 | .997  | 1.038 |
|        | Hypertension | -.098 | .273 | .129   | 1 | .719 | .906  | .530  | 1.549 |
|        | CHD          | .076  | .436 | .030   | 1 | .863 | 1.078 | .459  | 2.535 |
|        | Diabetes     | .663  | .305 | 4.717  | 1 | .030 | 1.941 | 1.067 | 3.531 |
|        | CRF          | .173  | .743 | .054   | 1 | .816 | 1.188 | .277  | 5.098 |
| Step 4 | Sex          | 1.094 | .310 | 12.422 | 1 | .000 | 2.985 | 1.625 | 5.483 |
|        | Age          | .017  | .010 | 2.768  | 1 | .096 | 1.017 | .997  | 1.038 |

|        |              |       |      |        |   |      |       |       |       |
|--------|--------------|-------|------|--------|---|------|-------|-------|-------|
|        | Hypertension | -.099 | .273 | .131   | 1 | .717 | .906  | .530  | 1.548 |
|        | Diabetes     | .660  | .305 | 4.685  | 1 | .030 | 1.935 | 1.064 | 3.518 |
|        | CRF          | .179  | .742 | .058   | 1 | .809 | 1.196 | .279  | 5.126 |
| Step 5 | Sex          | 1.089 | .309 | 12.387 | 1 | .000 | 2.971 | 1.620 | 5.448 |
|        | Age          | .017  | .010 | 2.720  | 1 | .099 | 1.017 | .997  | 1.037 |
|        | Hypertension | -.104 | .272 | .145   | 1 | .703 | .901  | .528  | 1.538 |
|        | Diabetes     | .668  | .303 | 4.869  | 1 | .027 | 1.951 | 1.078 | 3.532 |
| Step 6 | Sex          | 1.092 | .309 | 12.454 | 1 | .000 | 2.980 | 1.625 | 5.464 |
|        | Age          | .016  | .010 | 2.566  | 1 | .109 | 1.016 | .996  | 1.036 |
|        | Diabetes     | .659  | .302 | 4.759  | 1 | .029 | 1.933 | 1.069 | 3.495 |
| Step 7 | Sex          | 1.070 | .308 | 12.027 | 1 | .001 | 2.915 | 1.592 | 5.336 |
|        | Diabetes     | .709  | .301 | 5.564  | 1 | .018 | 2.032 | 1.127 | 3.662 |
